# Supplementary material
Source: PubMed Central journal article supplement (PMC6528466)
Supplement: NIHMS1522258-supplement-1.pdf [file NIHMS1522258-supplement-1.pdf]

**Supplementary Information**

**For**

**Par3 regulates polarized convergence between APP and BACE1 in  
hippocampal neurons**

Miao Sun<sup>1</sup>, Chengyu Huang<sup>2</sup>, Hui Wang<sup>1,2</sup> and Huaye Zhang<sup>1</sup>

1. Department of Neuroscience and Cell Biology, Rutgers Robert Wood Johnson Medical School, Piscataway, NJ
2. Department of Pharmacology, School of Pharmacy, Nantong University, Nantong, Jiangsu, China

Correspondence addressed to:

Huaye Zhang, Department of Neuroscience and Cell Biology, Rutgers Robert Wood Johnson Medical School, Piscataway, NJ 08854

Email: [huaye.zhang@rutgers.edu](mailto:huaye.zhang@rutgers.edu)

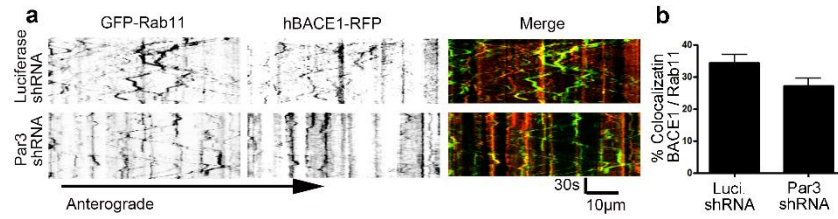

**Figure S1. Loss of Par3 does not significantly affect axonal colocalization of BACE1 with the recycling endosomal marker Rab11.**

- (a) Hippocampal neurons were transfected with indicated constructs together with GFP-Rab11 and hBACE1-RFP. Live images were captured at DIV11 and kymographs were generated to trace Rab11 and hBACE1 trafficking in axons.
- (b) Quantification of the percentage of BACE1 colocalized with Rab11. Data are expressed as Mean  $\pm$  SEM with Student's t test.  $P=0.057$ .
